# Supplementary material for: The Midline Axon Crossing Decision Is Regulated through an Activity-Dependent Mechanism by the NMDA Receptor
Source: eNeuro. 2018 Apr 17;5(2):ENEURO.0389-17.2018. doi: 10.1523/ENEURO.0389-17.2018 (PMC5952305; doi:10.1523/ENEURO.0389-17.2018)
Supplement: Extended Data Figure 1-1 — C/L ratio results for control and APV-treated embryos, including raw and normalized data. Download Figure 1-1, XLSX file. [file sup_enu-eN-NWR-0389-17-s02.xlsx]

## Sheet: Sheet1
	control	APV 0.5mM	background substract 50 pixel		control	control/normalized	APV 500uM	APV 500uM/normailzed
	0.376278	0.150264			0.376278	1.36037	0.150264	0.543254
	0.293494	0.127086			0.293494	1.06108	0.127086	0.459458
	0.357922	0.141595			0.357922	1.29401	0.141595	0.511913
	0.234005	0.23689			0.234005	0.846006	0.23689	0.856437
	0.529508	0.156606			0.529508	1.91435	0.156606	0.566184
	0.240204	0.357483			0.240204	0.868419	0.357483	1.29242
	0.226404	0.136346			0.226404	0.818529	0.136346	0.492937
	0.25792	0.238496			0.25792	0.932468	0.238496	0.862242
	0.201908	0.0753642			0.201908	0.729967	0.0753642	0.272467
	0.434335	0.0605149			0.434335	1.57027	0.0605149	0.218782
	0.134831	0.11486			0.134831	0.487461	0.11486	0.415256
	0.156271	0.195632			0.156271	0.564974	0.195632	0.707274
	0.12488	0.324809			0.12488	0.451483	0.324809	1.17429
	0.270478	0.253483			0.270478	0.977871	0.253483	0.916426
	0.38264	0.188702			0.38264	1.38337	0.188702	0.682222
	0.250215	0.105032			0.250215	0.904611	0.105032	0.379727
	0.230892	0.0667838			0.230892	0.834753	0.0667838	0.241446
		0.099215					0.099215	0.358696
		0.18018					0.18018	0.651412
mean	0.276599	0.168913		mean	0.276599
STDEV	0.108664	0.0831855
ttest		0.00193962
